# Supplementary material for: In vitro and in vivo anticancer activity of a thiourea tripyridyl dinuclear Cu(ii) complex
Source: Royal Society of Chemistry journal article supplement (doi:10.1039/c9nj03371h), 2019-01-01
Supplement: c9nj03371h1.pdf [file c9nj03371h1.pdf]

## Supplementary Material

# In vitro and in vivo anticancer activity of thiourea tripyridyl dinuclear Cu (II) complex

Jinjin Jin,<sup>a</sup> Jiyong Hu,<sup>\*b</sup> Yue Qin,<sup>b</sup> Junshuai Zhang,<sup>b</sup> Jin'an Zhao<sup>\*b</sup>, Liang Yue<sup>b</sup>, and Hongwei Hou<sup>a</sup>

<sup>a</sup>College of Chemistry and Molecular Engineering, Zhengzhou University, Zhengzhou 450001

<sup>b</sup>College of Chemical and Material Engineering, Henan University of Urban Construction, Pingdingshan 467036

\*Email: zjinan@zzu.edu.cn

### Contents

**Fig. S1** The XPS Cu(2p) spectrum of the complex **1**.

**Fig. S2** Auger spectrum of Cu in complex **1**.

**Fig. S3** a) Fluorescence quenching curves of EB (10  $\mu$ M) bound to DNA (100  $\mu$ M) by the ligand. The arrow shows the intensity changes upon increasing complex concentration. Insets: Stern - Volmer quenching curves of the fluorescence titration of the ligand. b) CD spectra of CT-DNA (50  $\mu$ M) in the absence and presence of the ligand.

**Fig. S4** Agarose gel electrophoresis patterns for the cleavage of pBR322 DNA by the ligand at 37 °C after 3 h of incubation. Lane 1, DNA control; lane 2, DNA + H<sub>2</sub>O<sub>2</sub> (1  $\mu$ L); lane 3, DNA + the ligand (40  $\mu$ M); lanes 4 - 8, DNA + H<sub>2</sub>O<sub>2</sub> (1  $\mu$ L) + the ligand (5, 10, 15, 20 and 40  $\mu$ M, respectively).

**Fig. S5** a) The survival curve of mice; b) Determination of the in vivo acute toxicity (LD<sub>50</sub>) of complex **1**.

**Fig. S6** The structure of the ligand Hdppc.

**Fig. S7** ESI-MS spectrum of complex **1**.

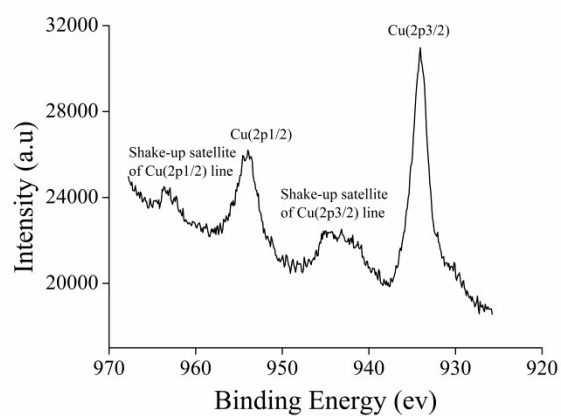

Fig. S1 The XPS Cu(2p) spectrum of the complex **1**.

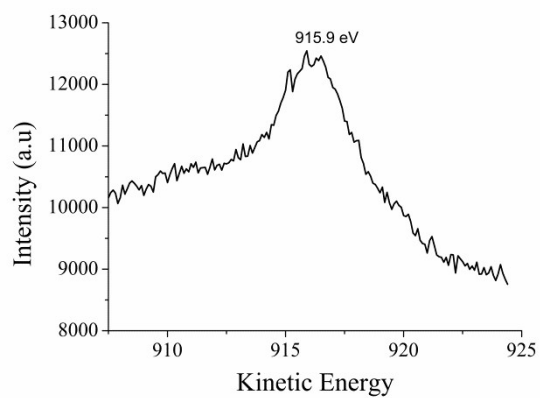

Fig. S2 Auger spectrum of Cu in complex **1**.

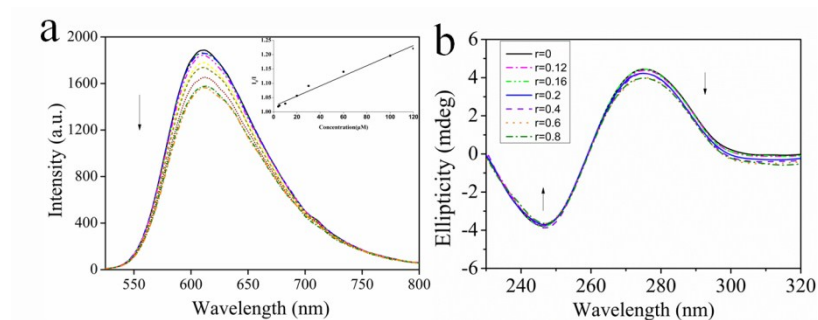

Fig. S3 a) Fluorescence quenching curves of EB (10  $\mu\text{M}$ ) bound to DNA (100  $\mu\text{M}$ ) by the ligand. The arrow shows the intensity changes upon increasing complex concentration. Insets: Stern - Volmer quenching curves of the fluorescence titration of the ligand. b) CD spectra of CT-DNA (50  $\mu\text{M}$ ) in the absence and presence of the ligand.

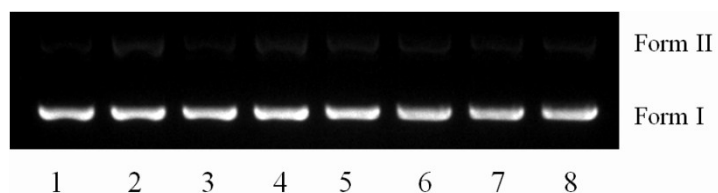

Fig. S4 Agarose gel electrophoresis patterns for the cleavage of pBR322 DNA by the ligand at 37  $^{\circ}\text{C}$  after 3 h of incubation. Lane 1, DNA control; lane 2, DNA +  $\text{H}_2\text{O}_2$  (1  $\mu\text{L}$ ); lane 3, DNA + the ligand (40  $\mu\text{M}$ ); lanes 4 - 8, DNA +  $\text{H}_2\text{O}_2$  (1  $\mu\text{L}$ ) + the ligand (5, 10, 15, 20 and 40  $\mu\text{M}$ , respectively).

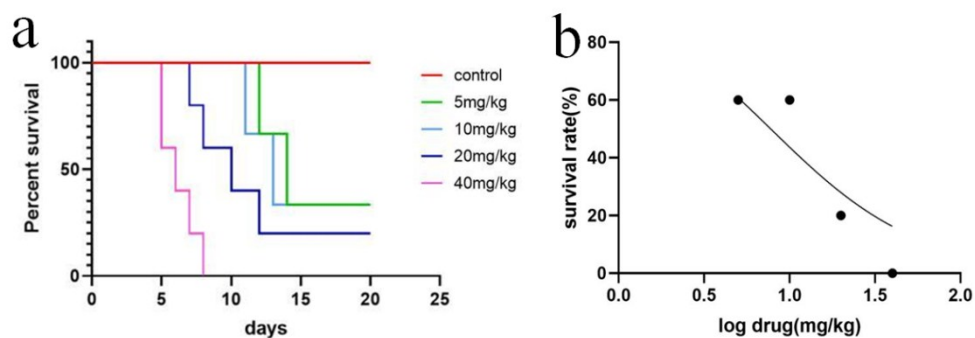

Fig. S5 a) The survival curve of mice; b) Determination of the in vivo acute toxicity (LD<sub>50</sub>) of complex **1**.

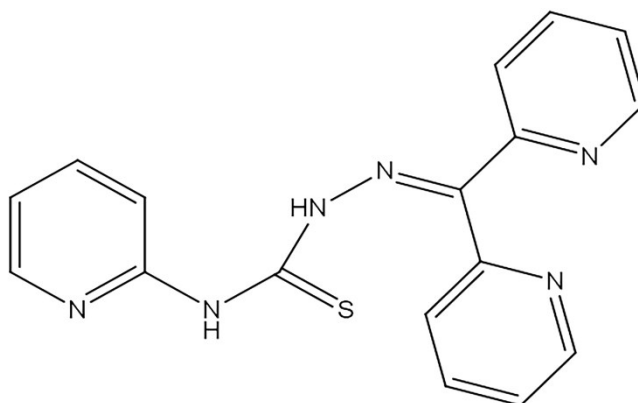

Fig. S6 The scheme of the ligand Hdppc.

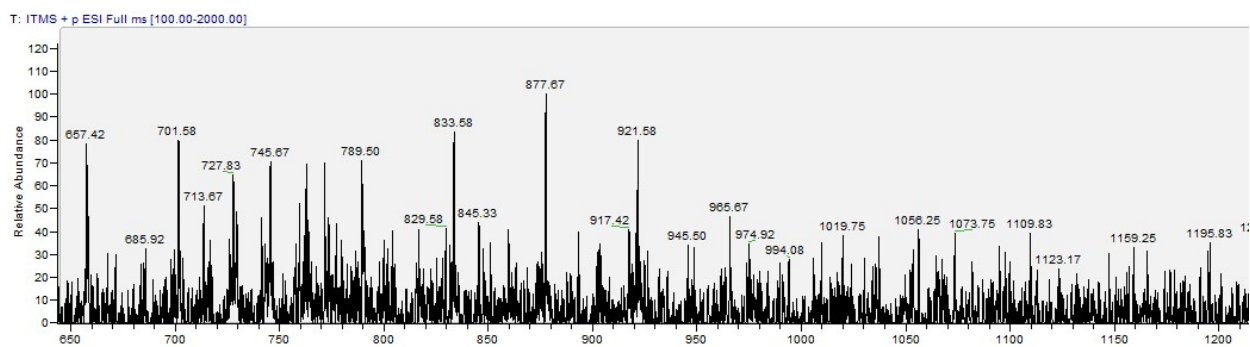

Fig. S7 ESI-MS spectrum of complex **1**.
